# Supplementary material for: DESMAN: a new tool for de novo extraction of strains from metagenomes
Source: PubMed Central journal article supplement (PMC5607848; doi:10.1186/s13059-017-1309-9), 2017-09-21
Supplement: 13059_2017_1309_MOESM1_ESM.pdf [file 13059_2017_1309_MOESM1_ESM.pdf]

**Supplementary Materials: DESMAN: a new  
tool for de novo extraction of strains from  
metagenomes**

| Identifier    | Species                                     | NCBI Acc_No                                        |
|---------------|---------------------------------------------|----------------------------------------------------|
| ESC_COL_K12   | Escherichia coli K-12                       | NC_000913.3                                        |
| ESC_COL_O104  | Escherichia coli STEC outbreak              | NC_018658.1, NC_018659.1, NC_018660.1, NC_018666.1 |
| ESC_COL_O157  | Escherichia coli Sakai                      | NC_002127.1, NC_002128.1, NC_002695.1              |
| ESC_COL_UT189 | Escherichia coli UPEC                       | NC_007941.1, NC_007946.1                           |
| ESC_COL_O127  | Escherichia coli EPEC                       | NC_011601.1, NC_011602.1, NC_011603.1              |
| BAC_VUL       | Bacteroides vulgatus ATCC 8482              | NC_009614.1                                        |
| BAC_THE       | Bacteroides thetaiotaomicron VPI-5482       | NC_004703.1                                        |
| BAC_FRA       | Bacteroides fragilis 638R                   | NC_016776.1                                        |
| BAC_HEL       | Bacteroides helcogenes P 36-108             | NC_014933.1                                        |
| BAC_SAL       | Bacteroides salanitronis DSM 18170          | NC_015166.1                                        |
| CLO_DIF       | Clostridium difficile B11                   | NC_017179.1                                        |
| FAE_PRA       | Faecalibacterium prausnitzii L2-6           | NC_021042.1                                        |
| ROS_HOM       | Roseburia hominis A2-183                    | NC_015977.1                                        |
| RUM_ALB       | Ruminococcus albus 7                        | NC_014833.1                                        |
| EUB_REC       | Eubacterium rectale ATCC 33656              | NC_012781.1                                        |
| BIF_LON       | Bifidobacterium longum subsp. longum BBMN68 | NC_014656.1                                        |
| ENT_FAE       | Enterococcus faecalis D32                   | NC_018223.1                                        |
| AKK_MUC       | Akkermansia muciniphila ATCC BAA-835        | NC_010655.1                                        |
| LAC_BRE       | Lactobacillus brevis ATCC 367               | NC_008499.1                                        |
| HEL_PYL       | Helicobacter pylori Rif1                    | NC_018937.1                                        |

**Table S1:** The 20 genomes used in the strain sythetic mock community.

| Data set                        | No. samples | No. reads           | Total length | No. contigs > 1kbp | No. contigs > 2kbp | N50 length |
|---------------------------------|-------------|---------------------|--------------|--------------------|--------------------|------------|
| 'Strain' mock                   | 64          | $1.504 \times 10^9$ | 60Mbp        | 7,545              | 6,002              | 10,000     |
| 'Complex strain' mock           | 96          | $1.198 \times 10^9$ | 409 Mbp      | 74,580             | 51,406             | 10,000     |
| <i>E. coli</i> O104:H4 outbreak | 53          | $2.2 \times 10^8$   | 317 Mbp      | 142,723            | 47,918             | 2,402      |

**Table S2:** Co-assembly statistics for three of the data sets used in this study. For the Tara assembly statistics please see the original paper [1]. The *E. coli* O104:H4 outbreak was assembled using Ray with kmer size 41 [2]. The synthetic 'strain' mock was assembled using idba\_ud with default parameters and kmer sizes increasing from 21 to 121 and the 'pre-correction' flag. The 'complex strain' mock was assembled with MEGAHIT and default parameters [3]. Contigs greater than 20kbp in length were fragmented into 10kbp pieces. The N50 length was calculated for contigs greater than 1kbp.

**Table S3: Confusion matrix for variant detection in the 'strain' mock.**

| Predicted | Actual  |       |
|-----------|---------|-------|
|           | False   | True  |
| False     | 249,584 | 125   |
| True      | 6       | 6,038 |

A contingency table or confusion matrix giving the frequency of positions that were (rows - True) or were not (rows - False) predicted to be variants with a FDR or q-value < 1.0e-3 that actually were (columns - True) or were not (columns - False). Overall prediction accuracy was 99.9% with a precision of 99.9% and a recall of 97.9%.

**Table S4: Comparison of inferred strains to true reference genomes in the ‘strain’ mock.**

| Predicted | Strain genomes |         |         |        |          |
|-----------|----------------|---------|---------|--------|----------|
|           | EC_O127        | EC_O104 | EC_O157 | EC_K12 | EC_UT189 |
| H_0       | 3532           | 1606    | 2083    | 16     | 3603     |
| H_1       | 3728           | 2306    | 39      | 2084   | 3753     |
| H_2       | 1715           | 3681    | 3755    | 3587   | 35       |
| H_3       | 10             | 3637    | 3718    | 3522   | 1728     |
| H_4       | 3628           | 27      | 2288    | 1591   | 3681     |

This table compares the predicted strains for one run of the algorithm with the five known *E. coli* genomes at each of the 6,044 variant positions. The integer frequencies give the number of positions where each strain (row) differs from a genome (column). The overall accuracy rate for correct prediction of SNVs at each position averaged over strains was 99.58%. The run used was the one with  $G = 5$  and lowest posterior mean deviance. The haplotype predictions were taken as the posterior mean of the  $\tau_{v,g,a}$  discretised by setting  $\tau_{v,g,m} = 1$  and  $\tau_{v,g,a \neq m} = 0$  where  $m = \arg \max_a \tau_{v,g,a}$ .

**Table S5: Comparison of inferred strains to true reference genomes in the ‘strain’ mock using the Lineage algorithm [4] for 1,000 variant positions.**

| Predicted | Strain genomes |         |         |        |          |
|-----------|----------------|---------|---------|--------|----------|
|           | EC_O127        | EC_O104 | EC_O157 | EC_K12 | EC_UT189 |
| H_0       | 147            | 741     | 740     | 736    | 138      |
| H_1       | 600            | 243     | 333     | 0      | 631      |
| H_2       | 600            | 243     | 333     | 0      | 631      |
| H_3       | 705            | 405     | 162     | 177    | 726      |
| H_4       | 601            | 7       | 354     | 236    | 632      |

This table compares the predicted strains for one run of the **Lineage** algorithm with the five known *E. coli* genomes at each of 1,000 variant positions chosen at random from the 6,044 variant positions. The integer frequencies give the number of positions where each strain (row) differs from a genome (column). The overall accuracy rate for mapping of strains onto genomes was 76.32%.

**Table S6: Comparison of inferred strains to true reference genomes in the ‘strain’ mock using the DESMAN algorithm for 1,000 variant positions.**

| Predicted | Strain genomes |         |         |        |          |
|-----------|----------------|---------|---------|--------|----------|
|           | EC_O127        | EC_O104 | EC_O157 | EC_K12 | EC_UT189 |
| H.0       | 600            | 243     | 334     | 0      | 634      |
| H.1       | 629            | 359     | 9       | 331    | 643      |
| H.2       | 277            | 635     | 646     | 631    | 5        |
| H.3       | 2              | 604     | 628     | 598    | 282      |
| H.4       | 602            | 4       | 355     | 239    | 636      |

This table compares the predicted strains for one run of the DESMAN algorithm with the five known *E. coli* genomes at each of 1,000 variant positions chosen at random from the 6,044 variant positions. The integer frequencies give the number of positions where each strain (row) differs from a genome (column). The overall SNV accuracy rate for mapping of strains onto genomes was 99.6%. The run used was the one with  $G = 5$  and lowest posterior mean deviance. The haplotype predictions were taken as the discretised posterior mean of the  $\tau_{v,g,a}$ .

**Table S7: Closest matching reference genomes for the eight inferred STEC strains from *E. coli* O104:H4 outbreak.**

| Strain | Closest ref.                 | $d$     | $1.0 - d$ |
|--------|------------------------------|---------|-----------|
| H.0    | <i>E. coli</i> 536           | 0.00758 | 0.99242   |
| H.1    | <i>E. coli</i> O127 H6 E2348 | 0.02117 | 0.97883   |
| H.2    | <i>E. coli</i> APEC O78      | 0.00305 | 0.99695   |
| H.3    | <i>E. coli</i> UMN026        | 0.04244 | 0.95756   |
| H.4    | <i>E. coli</i> APEC O78      | 0.02039 | 0.97961   |
| H.5    | <i>E. coli</i> ABU 83972     | 0.00195 | 0.99805   |
| H.6    | <i>E. coli</i> APEC O78      | 0.01411 | 0.98589   |
| H.7    | <i>E. coli</i> O104 H4 2011C | 0.00165 | 0.99835   |

Inferred strain sequences were aligned with references and a phylogenetic tree constructed for the eight inferred strains found for the *E. coli* O104:H4 outbreak. The run used was the one lowest posterior mean deviance. The haplotype predictions were taken as the discretised posterior mean of the  $\tau_{v,g,a}$ . The SCSGs for the strains and reference genomes were aligned separately using `mafft`[5], trimmed and then concatenated together. The tree was constructed using `FastTree`[6]. Here we give for each strain the closest reference in terms of phylogenetic distance,  $d$ , or total average nucleotide substitutions.

**Table S8: Comparison of true strains to DESMAN and Lineage inferred haplotypes for 25 clusters in the ‘complex strain’ mock.**

| <i>Cluster</i> | <i>TaxaID</i> | <i>Cov</i> | <i>V</i> | <i>H</i> | <i>G</i> | <i>G'</i> | <i>Err</i> | <i>Err'</i> |
|----------------|---------------|------------|----------|----------|----------|-----------|------------|-------------|
| Cluster3       | 75985         | 220        | 54       | 4        | 4        | 3         | 0.016      | 0.0142      |
| Cluster5       | 2209          | 87         | 185      | 5        | 2        | 2         | 0.328      | 0.358       |
| Cluster9       | 777           | 270        | 83       | 3        | 3        | 3         | 0          | 0           |
| Cluster22      | 34085         | 310        | 210      | 4        | 3        | 3         | 0.0111     | 0.00952     |
| Cluster24      | 774           | 1400       | 151      | 4        | 4        | 5         | 0.00662    | 0.2         |
| Cluster31      | 948           | 530        | 10       | 4        | 4        | 3         | 0          | 0           |
| Cluster32      | 285           | 240        | 244      | 2        | 2        | 2         | 0.0372     | 0.0331      |
| Cluster37      | 1833          | 300        | 99       | 3        | 3        | 3         | 0          | 0.0034      |
| Cluster38      | 714           | 290        | 189      | 4        | 3        | 2         | 0.03       | 0.0556      |
| Cluster39      | 1509          | 150        | 234      | 2        | 2        | 2         | 0.00214    | 0.00641     |
| Cluster44      | 480           | 630        | 54       | 3        | 3        | 3         | 0          | 0           |
| Cluster56      | 28173         | 190        | 206      | 2        | 2        | 2         | 0.00245    | 0           |
| Cluster58      | 96345         | 100        | 57       | 3        | 2        | 2         | 0.00877    | 0.00877     |
| Cluster59      | 587753        | 310        | 303      | 4        | 4        | 4         | 0.0347     | 0.0382      |
| Cluster64      | 2162          | 710        | 70       | 2        | 2        | 2         | 0          | 0           |
| Cluster67      | 28108         | 130        | 147      | 5        | 3        | 3         | 0.0208     | 0.0185      |
| Cluster72      | 382           | 720        | 42       | 2        | 2        | 2         | 0          | 0           |
| Cluster76      | 29447         | 500        | 170      | 5        | 4        | 3         | 0.0368     | 0.049       |
| Cluster78      | 1402          | 3400       | 95       | 2        | 2        | 2         | 0          | 0           |
| Cluster83      | 715           | 260        | 147      | 3        | 3        | 3         | 0.0403     | 0.0349      |
| Cluster86      | 1502          | 150        | 86       | 2        | 2        | 2         | 0          | 0           |
| Cluster90      | 85698         | 90         | 133      | 2        | 2        | 2         | 0          | 0           |
| Cluster101     | 1744          | 140        | 68       | 2        | 2        | 2         | 0          | 0           |
| Cluster104     | 1681          | 190        | 196      | 5        | 2        | 3         | 0.0204     | 0.0663      |
| Cluster132     | 2095          | 420        | 18       | 2        | 2        | 2         | 0          | 0           |

For the 25 75% complete CONCOCT clusters that possessed at least five variants and mapped onto species with strain variation, we give the NCBI Taxa ID that the cluster mapped to *TaxaID*, the total coverage summed across all 96 samples *Cov*, the number of variant positions predicted on the SCGs *V*, the true number of strains *H*, the inferred number of strains *G* by DESMAN, the number *G'* inferred by the Lineage algorithm, the mean error rate in SCG SNV predictions averaged over strains (*Err*) from DESMAN and mean error rate for Lineage (*Err'*).

**Table S9: Summary of the Tara regional co-assemblies.**

| Name                        | Acronym | No. of metagenomes | Reads(billion) | Contigs >2.5Kbp | Contig length >2.5Kbp (Mbp) |
|-----------------------------|---------|--------------------|----------------|-----------------|-----------------------------|
| Atlantic Ocean (North East) | ANE     | 7                  | 2.47           | 250,172         | 1,261                       |
| Atlantic Ocean (North West) | ANW     | 6                  | 1.92           | 223,940         | 1,144                       |
| Atlantic Ocean (South East) | ASE     | 6                  | 1.23           | 107,759         | 493                         |
| Atlantic Ocean (South West) | ASW     | 6                  | 2.17           | 158,640         | 781                         |
| Indian Ocean (North)        | ION     | 11                 | 3.90           | 272,745         | 1,322                       |
| Indian Ocean (South)        | IOS     | 10                 | 3.41           | 229,550         | 1,072                       |
| Mediterranean Sea           | MED     | 7                  | 2.37           | 243,494         | 1,357                       |
| Pacific Ocean (North)       | PON     | 8                  | 2.87           | 279,231         | 1,427                       |
| Pacific Ocean (South East)  | PSE     | 16                 | 5.33           | 449,817         | 2,260                       |
| Pacific Ocean (South West)  | PSW     | 7                  | 2.16           | 203,431         | 1,142                       |
| Red Sea                     | RED     | 6                  | 1.93           | 205,415         | 1,144                       |
| Southern Ocean              | SOC     | 3                  | 1.14           | 19,160 *        | 185                         |

The MAG name is the same as used in the original publication by Delmont *et al.* [1].

**Table S10: Summary of results from applying the DESMAN pipeline to the 32 Tara MAGs with coverage > 100.**

| Name               | Phylum            | Length  | NM | S  | SCG | FSCG | C     | SNV  | F     | tf   | vf   | G | Err  |
|--------------------|-------------------|---------|----|----|-----|------|-------|------|-------|------|------|---|------|
| TARA_ANE_MAG_00002 | Proteobacteria    | 3133556 | 47 | 18 | 36  | 36   | 17453 | 91   | 0.52  | 0.42 | 0.56 | 1 | 0.42 |
| TARA_ANE_MAG_00018 | Proteobacteria    | 1079517 | 19 | 19 | 33  | 27   | 9636  | 145  | 1.5   | 0.64 | 0.56 | 2 | 0.64 |
| TARA_ANE_MAG_00026 | Bacteroidetes     | 1357143 | 21 | 27 | 35  | 25   | 19461 | 962  | 4.94  | 0.69 | 0.59 | 2 | 0.69 |
| TARA_ANE_MAG_00032 | Proteobacteria    | 1808585 | 38 | 14 | 28  | 18   | 6238  | 104  | 1.67  | 0.43 | 0.38 | 2 | 0.43 |
| TARA_ANE_MAG_00050 | Proteobacteria    | 958701  | 21 | 16 | 28  | 24   | 13985 | 918  | 6.56  | 0.61 | 0.59 | 3 | 0.61 |
| TARA_ANW_MAG_00006 | Proteobacteria    | 5485499 | 70 | 25 | 36  | 27   | 22761 | 84   | 0.37  | 0.46 | 0.63 | 2 | 0.46 |
| TARA_ANW_MAG_00043 | Euryarchaeota     | 1179335 | 9  | 14 | 28  | 21   | 13034 | 408  | 3.13  | 0.52 | 0.5  | 3 | 0.52 |
| TARA_ION_MAG_00039 | Bacteroidetes     | 1530244 | 23 | 19 | 28  | 22   | 11341 | 332  | 2.93  | 0.68 | 0.57 | 2 | 0.68 |
| TARA_ION_MAG_00055 | Actinobacteria    | 1230383 | 13 | 19 | 30  | 21   | 6127  | 97   | 1.58  | 0.46 | 0.47 | 2 | 0.46 |
| TARA_IOS_MAG_00011 | Actinobacteria    | 1769542 | 33 | 11 | 34  | 19   | 673   | 1    | 0.15  | 0.59 | 0    | 1 | 0.59 |
| TARA_IOS_MAG_00024 | Proteobacteria    | 895557  | 30 | 21 | 34  | 23   | 13063 | 364  | 2.79  | 0.71 | 0.6  | 2 | 0.71 |
| TARA_IOS_MAG_00045 | Euryarchaeota     | 1184019 | 13 | 13 | 31  | 25   | 14426 | 354  | 2.45  | 0.5  | 0.46 | 3 | 0.5  |
| TARA_IOS_MAG_00046 | Actinobacteria    | 1601565 | 24 | 20 | 31  | 23   | 7116  | 92   | 1.29  | 0.47 | 0.57 | 2 | 0.47 |
| TARA_MED_MAG_00026 | Proteobacteria    | 1378810 | 33 | 27 | 34  | 21   | 8130  | 97   | 1.19  | 0.64 | 0.6  | 2 | 0.64 |
| TARA_MED_MAG_00040 | C. Marinimicrobia | 1716686 | 13 | 47 | 34  | 31   | 21131 | 2602 | 12.31 | 0.65 | 0.6  | 3 | 0.65 |
| TARA_MED_MAG_00051 | Proteobacteria    | 967888  | 37 | 19 | 34  | 26   | 11276 | 247  | 2.19  | 0.68 | 0.5  | 2 | 0.68 |
| TARA_MED_MAG_00062 | Bacteroidetes     | 1283464 | 26 | 19 | 32  | 24   | 16260 | 1852 | 11.39 | 0.62 | 0.56 | 5 | 0.62 |
| TARA_MED_MAG_00070 | Proteobacteria    | 886127  | 24 | 23 | 33  | 21   | 12489 | 148  | 1.19  | 0.68 | 0.55 | 3 | 0.68 |
| TARA_MED_MAG_00092 | Proteobacteria    | 1407426 | 21 | 20 | 28  | 19   | 10431 | 520  | 4.99  | 0.64 | 0.54 | 2 | 0.64 |
| TARA_MED_MAG_00093 | Bacteroidetes     | 1206176 | 26 | 12 | 31  | 28   | 21970 | 1763 | 8.02  | 0.68 | 0.6  | 3 | 0.68 |
| TARA_MED_MAG_00101 | Bacteroidetes     | 1246628 | 17 | 12 | 29  | 22   | 12167 | 417  | 3.43  | 0.65 | 0.58 | 3 | 0.65 |
| TARA_MED_MAG_00110 | Proteobacteria    | 890789  | 10 | 54 | 28  | 20   | 15456 | 1943 | 12.57 | 0.64 | 0.59 | 3 | 0.64 |
| TARA_PON_MAG_00026 | Proteobacteria    | 2180211 | 23 | 25 | 34  | 33   | 25359 | 1437 | 5.67  | 0.52 | 0.5  | 2 | 0.52 |
| TARA_PSE_MAG_00001 | Bacteroidetes     | 3950680 | 49 | 22 | 36  | 31   | 25481 | 18   | 0.07  | 0.57 | 0.67 | 1 | 0.57 |
| TARA_PSW_MAG_00048 | Proteobacteria    | 1681719 | 44 | 25 | 33  | 26   | 19549 | 1073 | 5.49  | 0.68 | 0.63 | 2 | 0.68 |
| TARA_PSW_MAG_00066 | Actinobacteria    | 2033721 | 27 | 18 | 33  | 19   | 11523 | 118  | 1.02  | 0.47 | 0.32 | 2 | 0.47 |
| TARA_PSW_MAG_00074 | Proteobacteria    | 1189144 | 31 | 41 | 28  | 21   | 14704 | 563  | 3.83  | 0.67 | 0.57 | 3 | 0.67 |
| TARA_PSW_MAG_00078 | Proteobacteria    | 670241  | 13 | 14 | 30  | 22   | 13582 | 636  | 4.68  | 0.65 | 0.6  | 2 | 0.65 |
| TARA_PSW_MAG_00081 | Chloroflexi       | 934890  | 20 | 29 | 30  | 26   | 16979 | 584  | 3.44  | 0.67 | 0.56 | 4 | 0.67 |
| TARA_RED_MAG_00001 | Proteobacteria    | 2849757 | 48 | 16 | 36  | 31   | 12671 | 135  | 1.07  | 0.35 | 0.36 | 2 | 0.35 |
| TARA_RED_MAG_00009 | Proteobacteria    | 930732  | 28 | 25 | 36  | 26   | 12293 | 388  | 3.16  | 0.69 | 0.6  | 3 | 0.69 |
| TARA_RED_MAG_00062 | Euryarchaeota     | 1266249 | 13 | 21 | 28  | 19   | 7914  | 115  | 1.45  | 0.61 | 0.57 | 2 | 0.61 |

The MAG name is the same as used in the original publication by Delmont *et al.* [1]. Phylum is the taxonomic assignment from that paper. Length is the total MAG sequence length in bp. NM gives the number of KEGG Pathway modules assigned to the MAG. S the number of metagenome samples for which the coverage was > 1.0. SCG the number of single copy core genes (SCGs) in the MAG. FSCG the number after filtering based on outlying sample coverages. C the bp of genes used for variant detection. SNV the number of variants detected. F the fraction of variable bases. tf the fraction of AT bases in the non-variable positions, vf the fraction of AT bases in the variable positions. G the number of inferred haplotypes and Err the estimated percentage uncertainty in those inferred haplotypes.

## References

- [1] Delmont, T.O., Quince, C., Shaiber, A., Esen, O.C., Lee, S.T.M., Lucker, S., Eren, A.M.: Nitrogen-fixing populations of Planctomycetes and Proteobacteria are abundant in the surface ocean. <http://biorxiv.org/content/early/2017/04/23/12979>
- [2] Boisvert, S., Raymond, F., Godzaridis, E., Laviolette, F., Corbeil, J.: Ray Meta: scalable de novo metagenome assembly and profiling. *Genome Biol.* **13:R122** (2012)
- [3] Dinghua, L., Chi-Man, L., Luo, R., Sadakane, K., Lam, T.-W.: Megahit: an ultra-fast single-node solution for large and complex metagenomics assembly via succinct de bruijn graph. *Bioinformatics* **31: 1674-1676** (2015)
- [4] O'Brien, J.D., Didelot, X., Iqbal, Z., Amenga-Etego, L., Ahiska, B., Falush, D.: A bayesian approach to inferring the phylogenetic structure of communities from metagenomic data. *Genetics* **3:925-37** (2014)
- [5] Katoh, M., Kuma, M.: Mafft: a novel method for rapid multiple sequence alignment based on fast fourier transform. *Nucleic Acids Res.* **30**, 3059–3066 (2002)
- [6] Price, M.N., Dehal, P.S., Arkin, A.P.: Fasttree 2 approximately maximum-likelihood trees for large alignments. *PLoS ONE* **5**, 9490 (2010)
- [7] Alneberg, J., Bjarnason, B., de Bruijn, I., Schirmer, M., Quick, J., Ijaz, U., Lahti, L., Loman, N.J., Anderson, A.F., Quince, C.: Binning metagenomic contigs by coverage and composition. *Nat. Methods* **11**, 1144–1146 (2014)

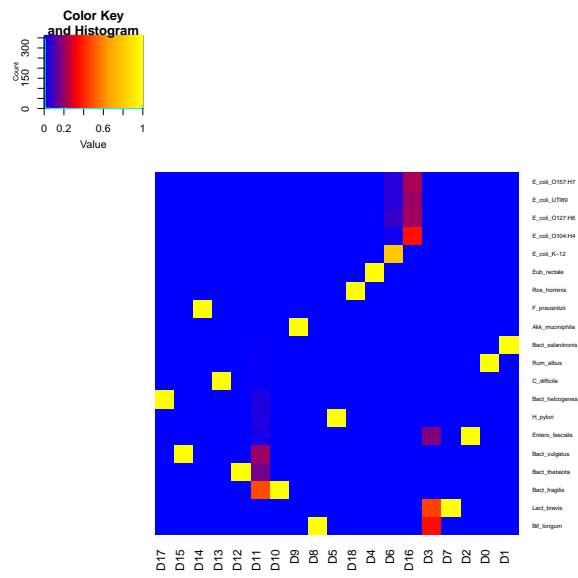

**Figure S1: Confusion matrix for the synthetic ‘strain’ mock.** Heat-map where intensity indicates proportion of contigs in each CONCOCT cluster that derive from each strain. There were 19 clusters and 20 strains. The recall was 98.1% and precision 96.1% comparing the genome labels and clusters [7] with an overall accuracy of 0.971 as given by the adjusted Rand index.



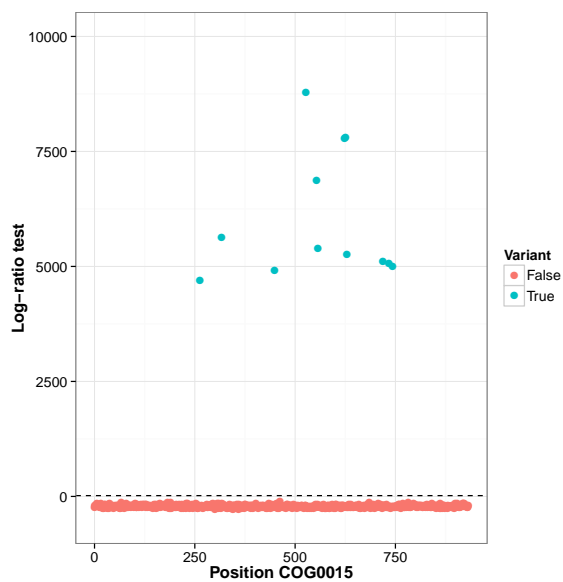

**Figure S2: Log-ratio test statistic for variants on COG0015 of the synthetic ‘strain’ mock.** The likelihood ratio test statistic (Equation 2) for positions along COG0015 - Adenylosuccinate lyase. Positions that are true variants are coloured blue, positions with no variation, red. The dashed line corresponds to a FDR or q-value of  $1.0e-3$ . Positions above this line are classified as variants under the test. Note negative log-ratios occur because the minimum variant frequency  $p_L$  is set at 1%.

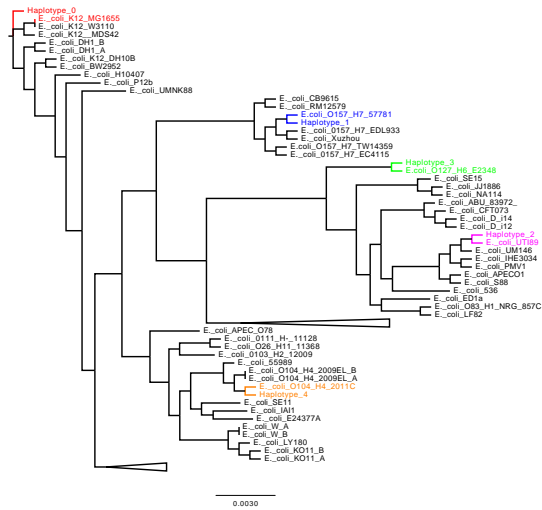

**Figure S3: Phylogenetic tree constructed for the five inferred strains found in the ‘synthetic strain’ mock and 62 *E. coli* reference sequences.** The 372 SCSGs for the strains and reference genomes were aligned separately using `mafft`[5], trimmed and then concatenated together. The tree was constructed using `FastTree`[6]. The known reference genome each strain mapped onto from Supplementary Table S4 is shown in the same colour as the corresponding strain. These results were for the run with  $G = 5$  that had the lowest posterior mean deviance.

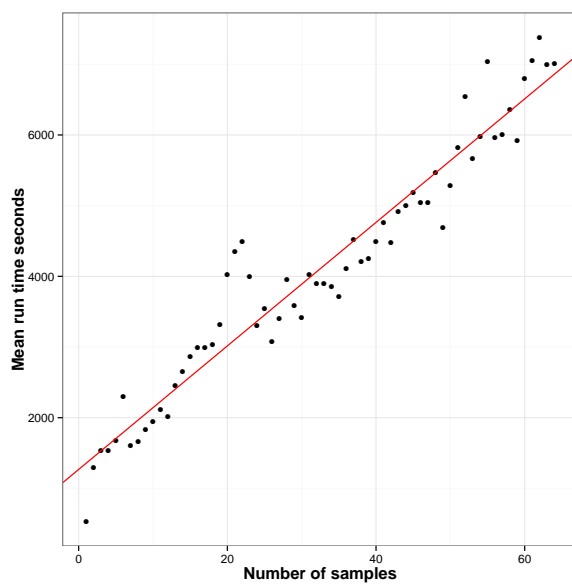

**Figure S4: Run times for DESMAN in seconds for increasing sample number.** The total run time for DESMAN on the synthetic ‘strain’ mock is shown as a function of number of samples. Results are the mean time averaged over twenty replicates comprising random subsamples of the original 64 samples. Each run was for  $G = 5$  and run on a Intel(R) Xeon(R) CPU E7-8850 v2 @ 2.30GHz.

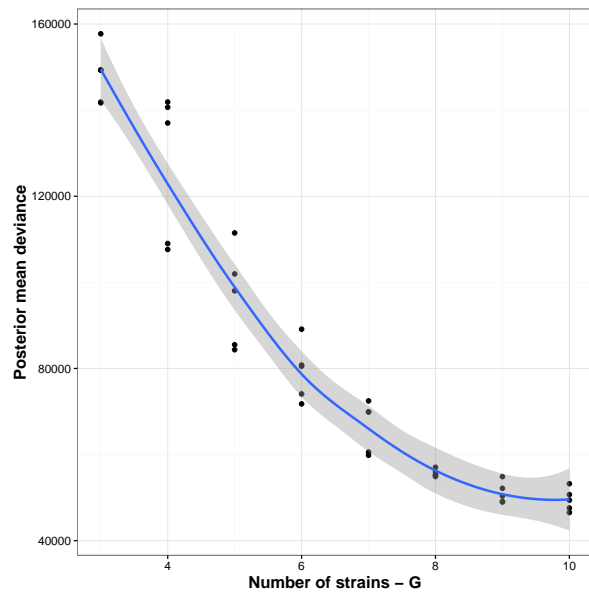

**Figure S5: Posterior mean deviance as a function of  $G$  for the *E. coli* O104:H4 outbreak SCSG positions.** The posterior mean deviance as a function of  $G$  for five replicates running the strain resolution Gibbs sampler for 1,000 random positions from the 28,435 potential variants identified on the 440 SCSGs for the *E. coli* clusters in the *E. coli* O104:H4 outbreak.

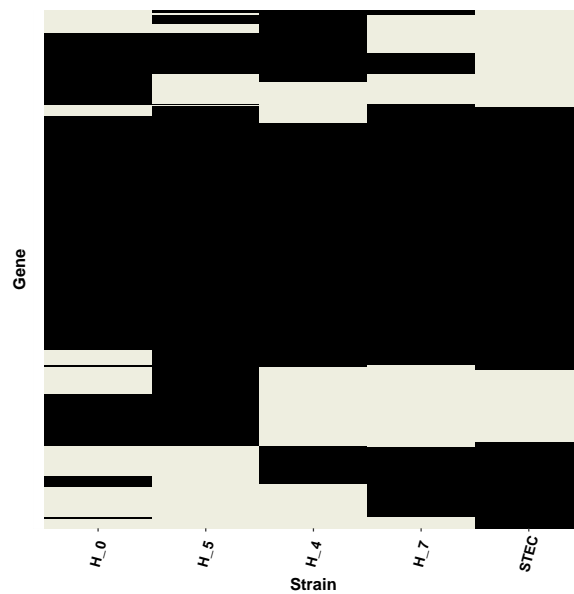

**Figure S6: Comparison of gene presence/absence inferred for the four strains we are confident in from the STEC *E. coli* O104:H4 outbreak together with results for the known outbreak genome.** Gene presence/absences (black/ivory) were inferred for the strains. They were calculated for the STEC genome (*Escherichia coli* O104:H4 str. 2011C) by mapping using MUMmer. Comparing  $H_7$  and the STEC genome, 91.8% of counts matched. These results were for the run with  $G = 8$  that had the lowest posterior mean deviance.

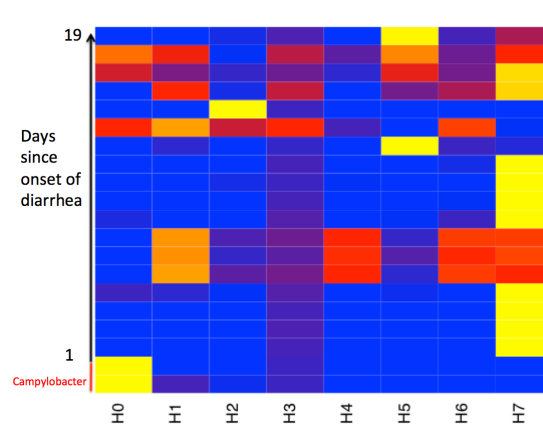

**Figure S7: strain relative abundances across samples for the STEC *E. coli* O104:H4 outbreak.** The relative frequencies of the eight predicted *E. coli* strains in the twenty samples from the STEC *E. coli* O104:H4 outbreak that had a mean coverage across *E. coli* SCSGs greater than five. The two samples at the bottom of the heat map derived from a *Campylobacter jejuni* infected individual, the other 18 samples were all determined to be infected with STEC. We have ordered these by ‘Days since onset of diarrhea (ddays)’, the number of days ago that the individual first experienced diarrhea symptoms. The relative abundance of strain H7 negatively correlates with *ddays* ( $\tau = -0.366$ ,  $p = 0.0414$ , Kendall’s tau coefficient).

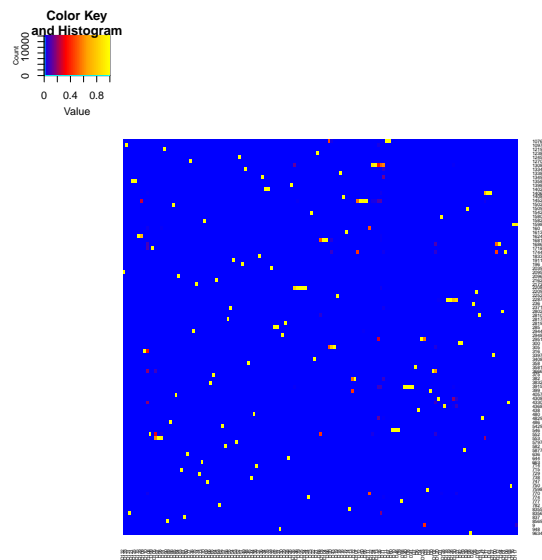

**Figure S8: Confusion matrix for the synthetic ‘complex strain’ mock.** Heatmap where intensity indicates proportion of contigs in each CONCOCT cluster that derive from each species. There were 137 clusters and 100 species. The recall was 86.1% and precision 98.2% comparing the species labels and clusters [7] with an overall accuracy of 0.830 as given by the adjusted Rand index.

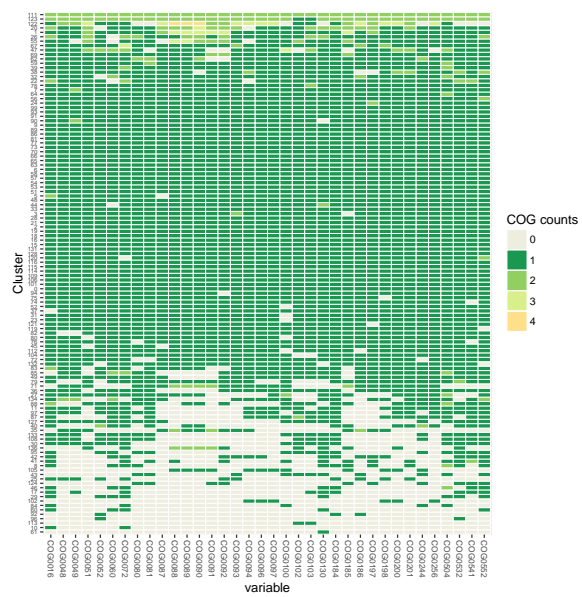

**Figure S9: Single core gene frequencies in the 137 CONCOCT clusters generated by binning all contigs  $> 1kbp$  in length from the 96 ‘complex strain’ mock samples. 75 of these clusters were at least 75% pure and complete. Each row corresponds to a cluster and columns are SCGs.**



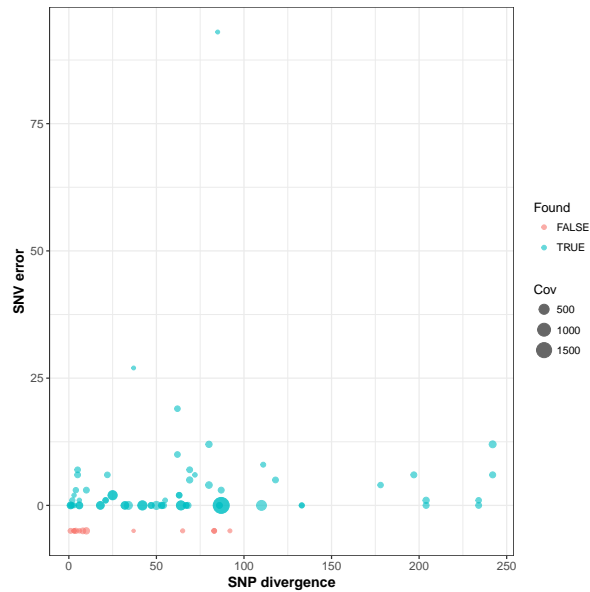

**Figure S10: Number of SNV errors in inferred haplotypes vs. the number of SNP differences to closest matching reference.** For every reference strain in the 25 species that mapped onto the 25 clusters for which multiple strains were present and at least five variants were observed (79 in total) we calculated the SNP divergence to the most similar strain in that species (x-axis,  $S$ ). Then for the 67 strains (84.8%) that were detected as haplotypes by DESMAN we calculated their error rate as SNVs different to the true reference strain (y-axis,  $E$ ). Those strains not found are placed on the negative y-axis. There was a negative correlation between fractional error rate ( $f = E/S$ ) and SNP divergence ( $S$ ) (p-value=0.036) for those strains that were detected. There was a positive correlation between individual strain coverage and the probability that a strain is actually detected (logistic regression - estimate  $0.043 \pm 0.015$ , p-value = 0.00352).

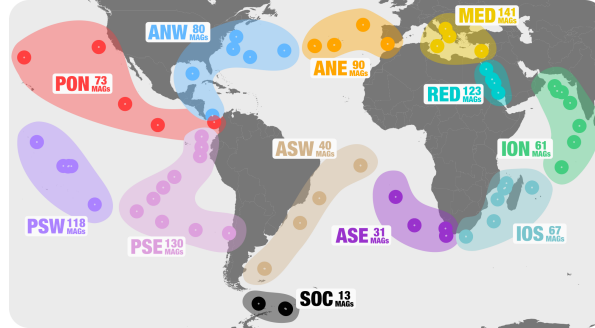

**Figure S11: Tara MAG summary.** Summary showing the 12 geographic regions corresponding to the co-assemblies together with the number of MAGs obtained from each. Reproduced from Delmont *et al.* [1].

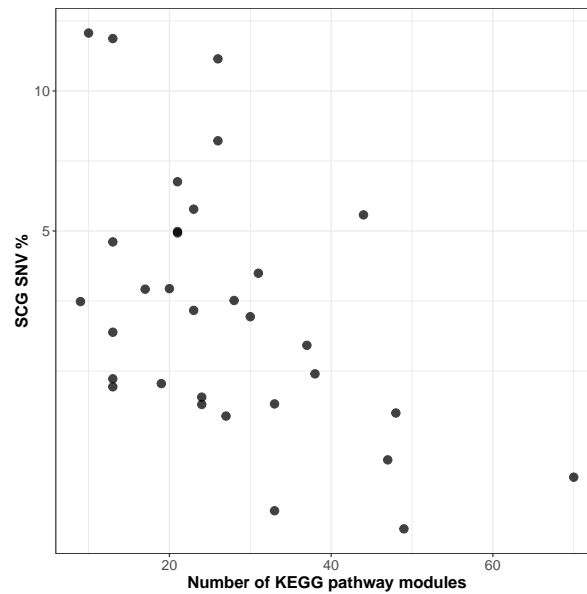

**Figure S12: Top panel) SCG SNV frequency as a percentage against number of KEGG Pathway modules for the 32 Tara MAGs with total coverage > 100.** A significant negative correlation was observed (Spearman's test,  $\rho = -0.485$ , p-value = 0.0049).

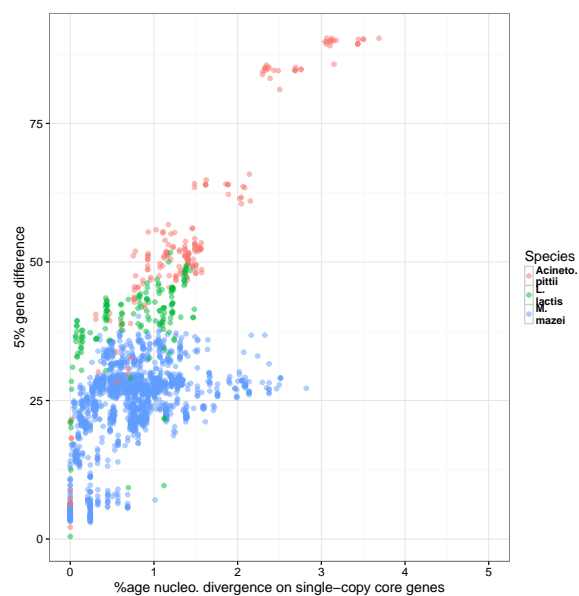

**Figure S13: Percentage SCG nucleotide divergence against percentage genome divergence for strains deriving from three environmental species.** For each species (*Methanosarcina mazei*, *Lactococcus lactis* and *Acinetobacter pittii*), strains were downloaded from the NCBI list of bacterial and archaeal genomes. We then compared percentage nucleotide divergence on the single-copy core genes with genome divergence as a percentage of 5% gene clusters not shared between each pair of strains with nucleotide divergence < 5% for each species. In all three cases the relationship was highly significant but with different regression coefficients (*Methanosarcina mazei* — coeff. 7.7, Adjusted R-squared: 0.2246, p-value < 2.2e-16, *Lactococcus lactis* — coeff. 8.2, Adjusted R-squared: 0.2401, p-value = 3.829e-11 and *Acinetobacter pittii* — coeff. 21.4, Adjusted R-squared: 0.8892, p-value < 2.2e-16).
